# Supplementary material for: Role of Ce in the enhanced performance of the water oxidation reaction and urea oxidation reaction for NiFe layered double hydroxides
Source: Royal Society of Chemistry journal article supplement (doi:10.1039/d2dt00862a), 2022-01-01
Supplement: d2dt00862a1.pdf [file d2dt00862a1.pdf]

## Role of Ce in enhanced performance of water oxidation reaction and urea oxidation reaction for NiFe Layered Double Hydroxide

Jianfeng Fan<sup>a</sup> and Xiaoqiang Du<sup>b\*</sup>

<sup>a</sup>Department of Chemistry, Xinzhou Normal University, Xinzhou 034000, People's Republic of China.

<sup>b</sup>School of Chemical Engineering and Technology, North University of China, Xueyuan road 3, Taiyuan 030051, People's Republic of China. E-mail: duxq16@nuc.edu.cn

Turnover frequency (TOF) value of catalysts was calculated based on the equation:  $TOF = (J \times A) / (4 \times F \times n)$ , where  $J$  (mA/cm<sup>2</sup>) is the current density;  $A$  is the surface area of electrode (1 cm<sup>2</sup>);  $F$  is the Faraday constant (96485 C/mol);  $n$  is molar number of active sites on the electrode. Both Ni, Fe and Ce in NiFe LDH, Ce-NiFe LDH and Ce(OH)<sub>3</sub>@NiFe LDH are regarded as active sites. The mass activity (MA) is calculated according to the equation:  $MA = J/m$ , where  $J$  (mA/cm<sup>2</sup>) is the current density at overpotential of 300 mV;  $m$  is the mass of active sites (Ni, Fe and Ce) deposited onto nickel foam.

**Table S1.** XPS fitting parameters for the binding energies of the resulting material.

| Samples                       | Binding energy [eV] |                   |                   |                   |                   |                   |                   |                   |                   |                   |
|-------------------------------|---------------------|-------------------|-------------------|-------------------|-------------------|-------------------|-------------------|-------------------|-------------------|-------------------|
|                               | Ni <sup>2+</sup>    |                   | Ni <sup>3+</sup>  |                   | Fe <sup>3+</sup>  |                   | Ce <sup>3+</sup>  |                   | Ce <sup>4+</sup>  |                   |
|                               | 2p <sub>3/2</sub>   | 2p <sub>1/2</sub> | 2p <sub>3/2</sub> | 2p <sub>1/2</sub> | 2p <sub>3/2</sub> | 2p <sub>1/2</sub> | 3d <sub>5/2</sub> | 3d <sub>3/2</sub> | 3d <sub>5/2</sub> | 3d <sub>3/2</sub> |
| Ce(OH) <sub>3</sub> @NiFe LDH | 856.45              | 873.0             | /                 | /                 | 713.3             | 724.1             | 873.6             | 899.1             | 875.5             | 902.5             |
|                               |                     |                   |                   |                   |                   |                   | 879.1             | 905.0             | 881.3             | 907.8             |
|                               |                     |                   |                   |                   |                   |                   |                   |                   | 884.1             | 917.2             |
| Ce-NiFe LDH                   | 856.4               | 872.9             | /                 | /                 | 713.6             | 724.3             | 873.7             | 899.2             | 875.6             | 902.6             |
|                               |                     |                   |                   |                   |                   |                   | 879.2             | 905.1             | 881.4             | 907.9             |
|                               |                     |                   |                   |                   |                   |                   |                   |                   | 884.2             | 917.3             |
| NiFe-LDH                      | 856.3               | 872.8             | /                 | /                 | 714.0             | 724.5             | /                 | /                 | /                 | /                 |

**Table S2.** XPS fitting parameters for the Ce peak area of the resulting material.

| Samples<br>(Ce <sup>3+</sup> /Ce <sup>4+</sup> ratio) | Peak area         |                   |                   |                   |
|-------------------------------------------------------|-------------------|-------------------|-------------------|-------------------|
|                                                       | Ce <sup>3+</sup>  |                   | Ce <sup>4+</sup>  |                   |
|                                                       | 3d <sub>5/2</sub> | 3d <sub>3/2</sub> | 3d <sub>5/2</sub> | 3d <sub>3/2</sub> |
| Ce(OH) <sub>3</sub> @NiFe LDH                         | 5648              | 4958              | 14539             | 5654              |
|                                                       | 6622              | 3790              | 3843              | 3248              |
| Ce-NiFe LDH                                           |                   |                   | 2479              | 4256              |
|                                                       | 8137              | 2179              | 13954             | 15886             |
|                                                       | 21892             | 10237             | 5321              | 5347              |
|                                                       |                   | 2742              | 2395              |                   |

**Table S3.** Comparison of OER performances for Ce(OH)<sub>3</sub>@NiFe LDH/NF with other reported electrocatalysts.

| Electrocatalysts                                 | Overpotential                         | References                                        |
|--------------------------------------------------|---------------------------------------|---------------------------------------------------|
| <b>Ce(OH)<sub>3</sub>@NiFe LDH</b>               | <b>220 mV at 10mA cm<sup>-2</sup></b> | <b>This work</b>                                  |
| ZnCo LDH                                         | 325 mV at 10mA cm <sup>-2</sup>       | J. Mater. Chem. A, 2020,8, 8692-8699              |
| NiCo <sub>2</sub> S <sub>4</sub> @NiFe LDH       | 201 mV at 60 mA cm <sup>-2</sup>      | ACS Appl. Mater. Interfaces 2017, 9, 15364–15372  |
| CoO <sub>x</sub> /FeO <sub>x</sub> /CNT          | 308 mV at 10 mA cm <sup>-2</sup>      | J. Mater. Chem. A, 2020, 8, 15140–15147           |
| NiS <sub>2</sub> /NiSe <sub>2</sub> nanocage     | 290 mV at 20 mA cm <sup>-2</sup>      | Small 2020, 16, 1905083                           |
| Co-Fe-V metal oxides                             | 249 mV at 10 mA cm <sup>-2</sup>      | J. Mater. Chem. A, 2020, 8, 15951–15961           |
| P-doped NiCo <sub>2</sub> O <sub>4</sub>         | 300 mV at 10 mA cm <sup>-2</sup>      | ACS Appl. Mater. Interfaces 2020, 12, 2763–2772   |
| NiS/Fe <sub>3</sub> O <sub>4</sub> HNPs@CNT      | 243 mV at 10 mA cm <sup>-2</sup>      | ACS Appl. Mater. Interfaces 2020, 12, 31552–31563 |
| Fe <sub>3</sub> O <sub>4</sub> /FeS <sub>2</sub> | 253 mV at 10 mA cm <sup>-2</sup>      | J. Mater. Chem. A, 2020, 8, 14145–14151           |
| CoMoOS nanoboxes                                 | 281 mV at 10 mA cm <sup>-2</sup>      | Appl. Catal. B: Environ. 2020, 265, 118605        |
| Ni <sub>59</sub> Cu <sub>19</sub> P <sub>9</sub> | 307 mV at 10 mA cm <sup>-2</sup>      | Appl. Catal. B: Environ. 2018, 237, 409–415       |
| Fe-Ni-P-B-O                                      | 236 mV at 10 mA cm <sup>-2</sup>      | ACS Nano 2019, 13, 12969–12979                    |
| hollow Fe-Co <sub>x</sub> P                      | 300 mV at 10 mA cm <sup>-2</sup>      | Chem. Eng. J. 2021, 409, 128227                   |

**Table S4.** Comparison of UOR performances for Ce(OH)<sub>3</sub>@NiFe LDH/NF with other reported electrocatalysts.

| Catalyst                                                | Electrolyte               | potential      | Ref                                      |
|---------------------------------------------------------|---------------------------|----------------|------------------------------------------|
| <b>Ce(OH)<sub>3</sub>@NiFe LDH</b>                      | <b>1 M KOH+0.5 M urea</b> | <b>1.40@10</b> | <b>This work</b>                         |
| Fe <sub>2</sub> P@Ni <sub>x</sub> P/NF                  | 1 M KOH+0.5 M urea        | 1.34@100       | Chem. Eng. J., 2021,417, 128067          |
| Fe <sub>11.1%</sub> -Ni <sub>3</sub> S <sub>2</sub> /NF | 1 M KOH+0.33 M urea       | 1.36@100       | J. Mater. Chem. A, 2018, 6, 4346-4353    |
| Mo-Ni <sub>3</sub> S <sub>2</sub>                       | 1 M KOH+0.3 M urea        | 1.37@100       | J. Mater. Chem. A, 2021, 9, 3418-3426    |
| V-Ni <sub>3</sub> N                                     | 1 M KOH+0.5 M urea        | 1.39@100       | J. Mater.Chem. A, 2021, 9, 4159-4166     |
| Ni/FeOOH                                                | 1 M KOH+0.5 M urea        | 1.4@100        | Chem. Commun., 2020, 56 ,14713-14716     |
| Ni-S-Se/NF                                              | 1 M KOH+0.5 M urea        | 1.41@100       | Nano Energy, 2021,81, 105605             |
| CoS <sub>x</sub> /Co-MOF                                | 1 M KOH+0.5 M urea        | 1.42@100       | Inorg. Chem. Front., 2020,7, 2602-2610   |
| MNPBA-P                                                 | 1 M KOH+0.5 M urea        | 1.43@100       | ACS Sus. Chem. Eng., 2020,8, 16037-16045 |
| Co-Z/Se-2                                               | 1 M KOH+0.5 M urea        | 1.44@100       | J. Power Sources 2021,491, 229592        |

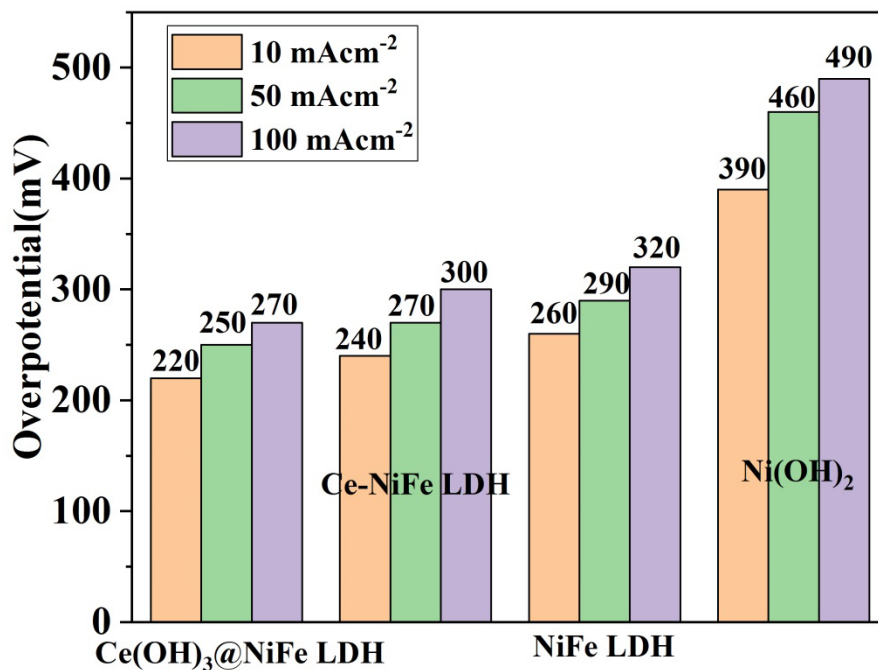

**Fig. S1** The overpotential of Ni(OH)<sub>2</sub>/NF, NiFe LDH/NF, Ce-NiFe LDH/NF and Ce(OH)<sub>3</sub>@NiFe LDH/NF at 100 mA cm<sup>-2</sup> for OER.

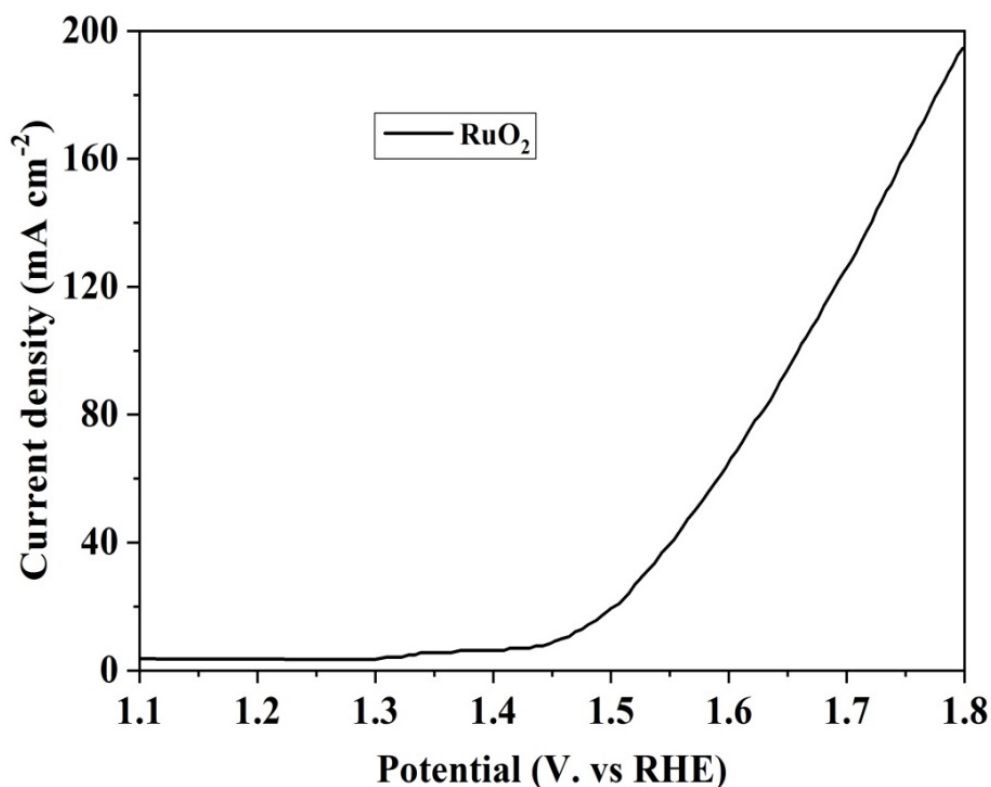

**Fig. S2** Polarization curve of the RuO<sub>2</sub> for OER with a scan rate of 5 mV s<sup>-1</sup> in 1 M KOH.

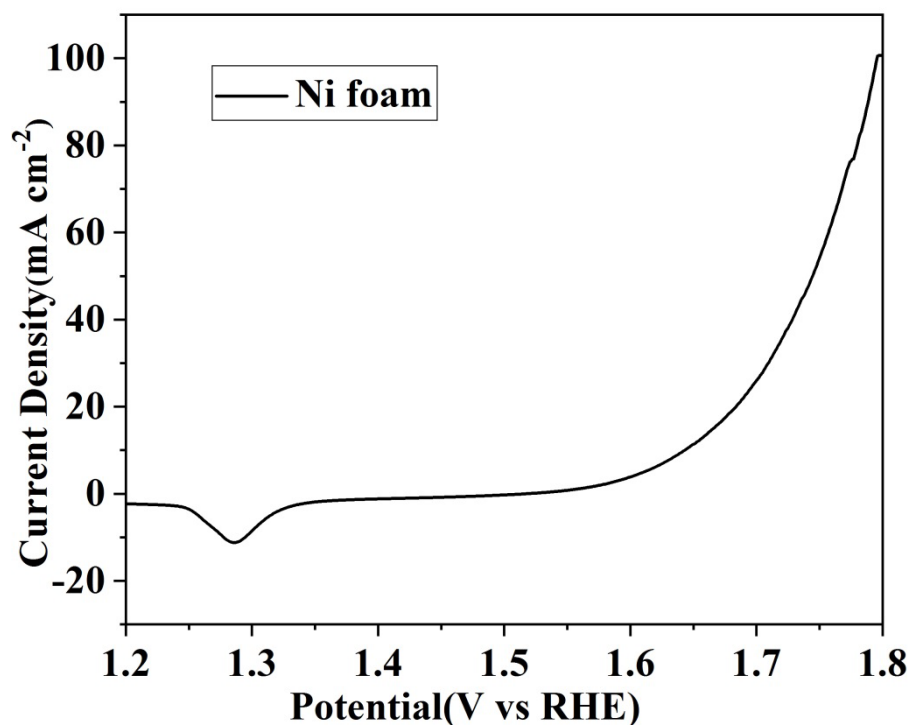

Fig. S3 Polarization curve of the Ni foam for OER with a scan rate of  $5 \text{ mV s}^{-1}$  in 1 M KOH.

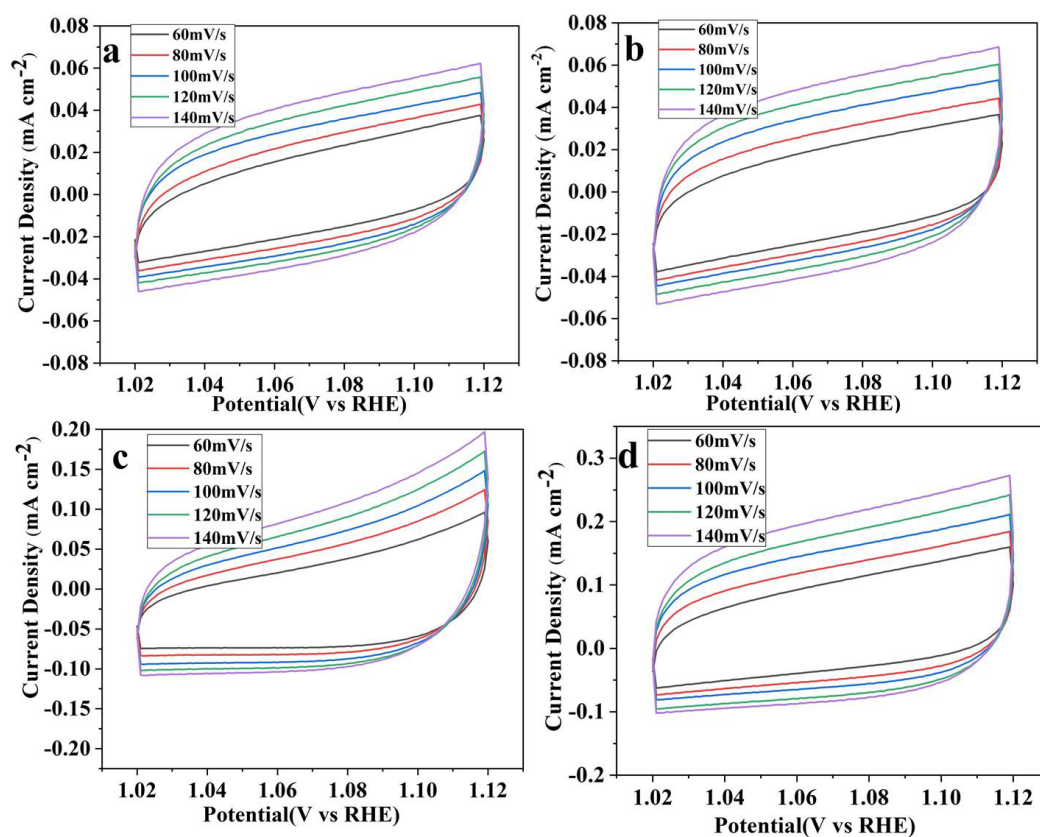

Fig. S4 CV curves with different scan rates for OER, Ni(OH)<sub>2</sub>/NF (a), NiFe LDH/NF (b), Ce-NiFe LDH/NF (c) and Ce(OH)<sub>3</sub>@NiFe LDH/NF (d).

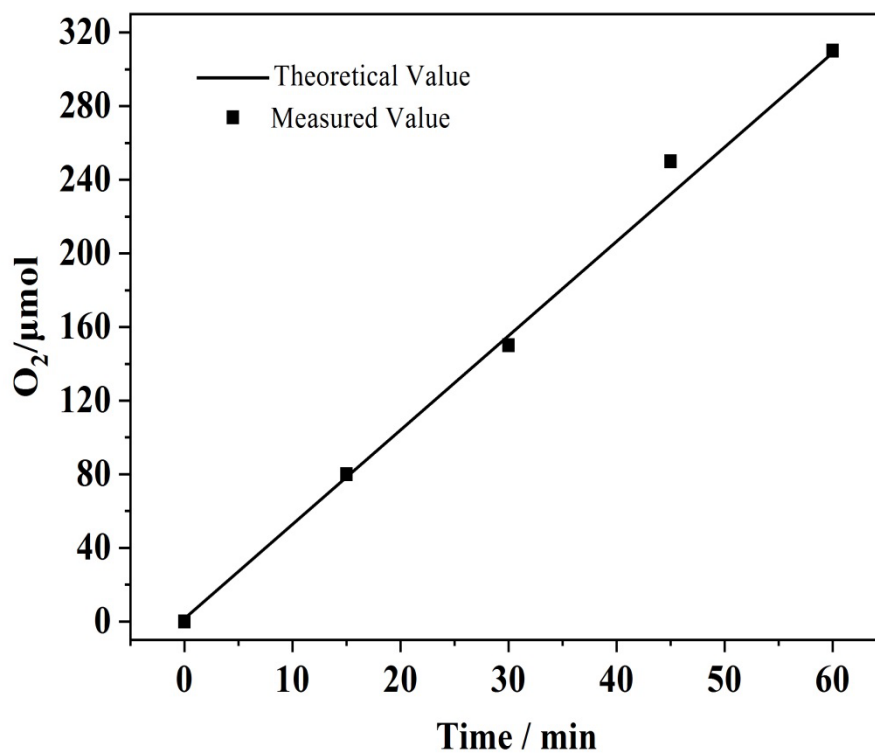

Fig. S5 Electrocatalytic efficiency of O<sub>2</sub> production over Ce(OH)<sub>3</sub>@NiFe LDH/NF.

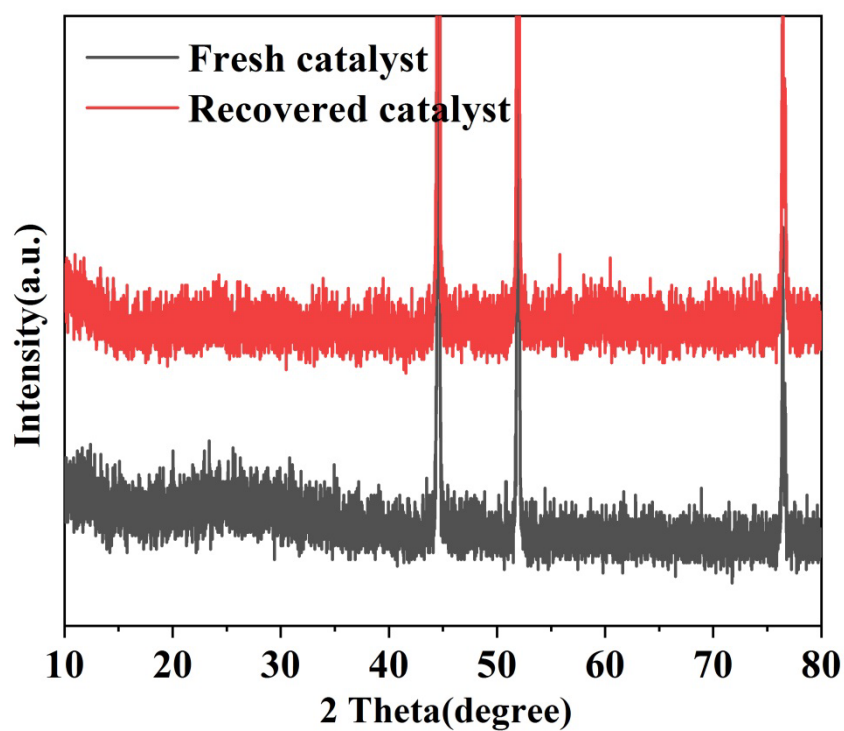

Fig. S6 XRD of fresh (a) and recovered (b) Ce(OH)<sub>3</sub>@NiFe LDH/NF for OER.

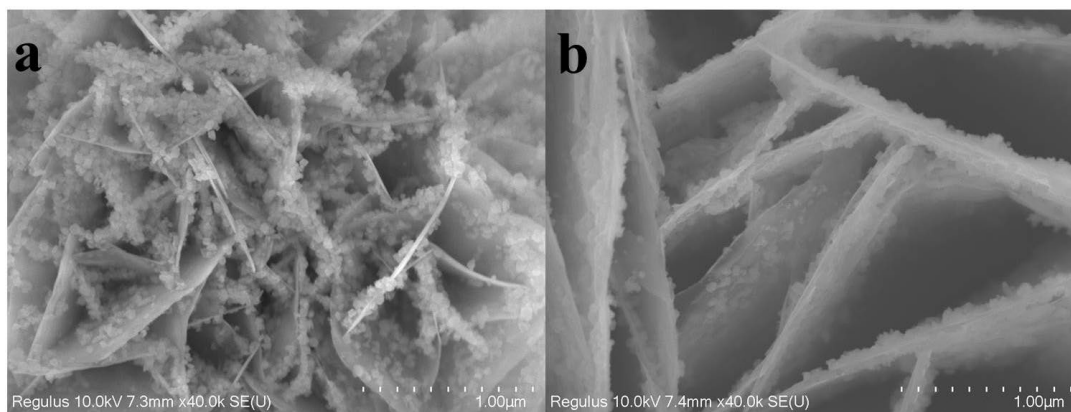

**Fig. S7** SEM of fresh (a) and recovered (b)  $\text{Ce(OH)}_3\text{@NiFe LDH/NF}$  for OER.

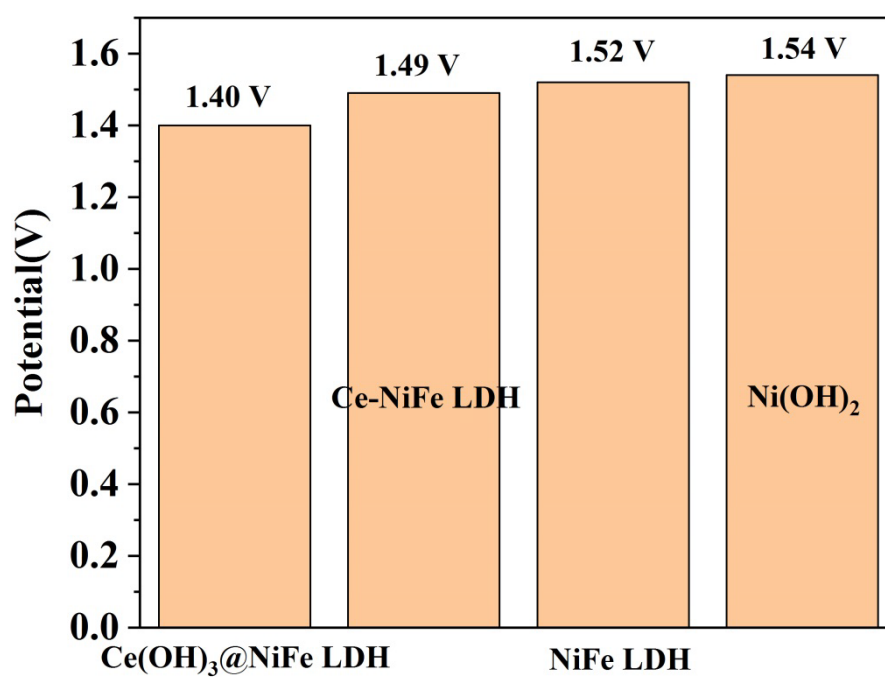

**Fig. S8** The potential of  $\text{Ni(OH)}_2\text{/NF}$ ,  $\text{NiFe LDH/NF}$ ,  $\text{Ce-NiFe LDH/NF}$  and  $\text{Ce(OH)}_3\text{@NiFe LDH/NF}$  at  $10 \text{ mA cm}^{-2}$  for UOR.

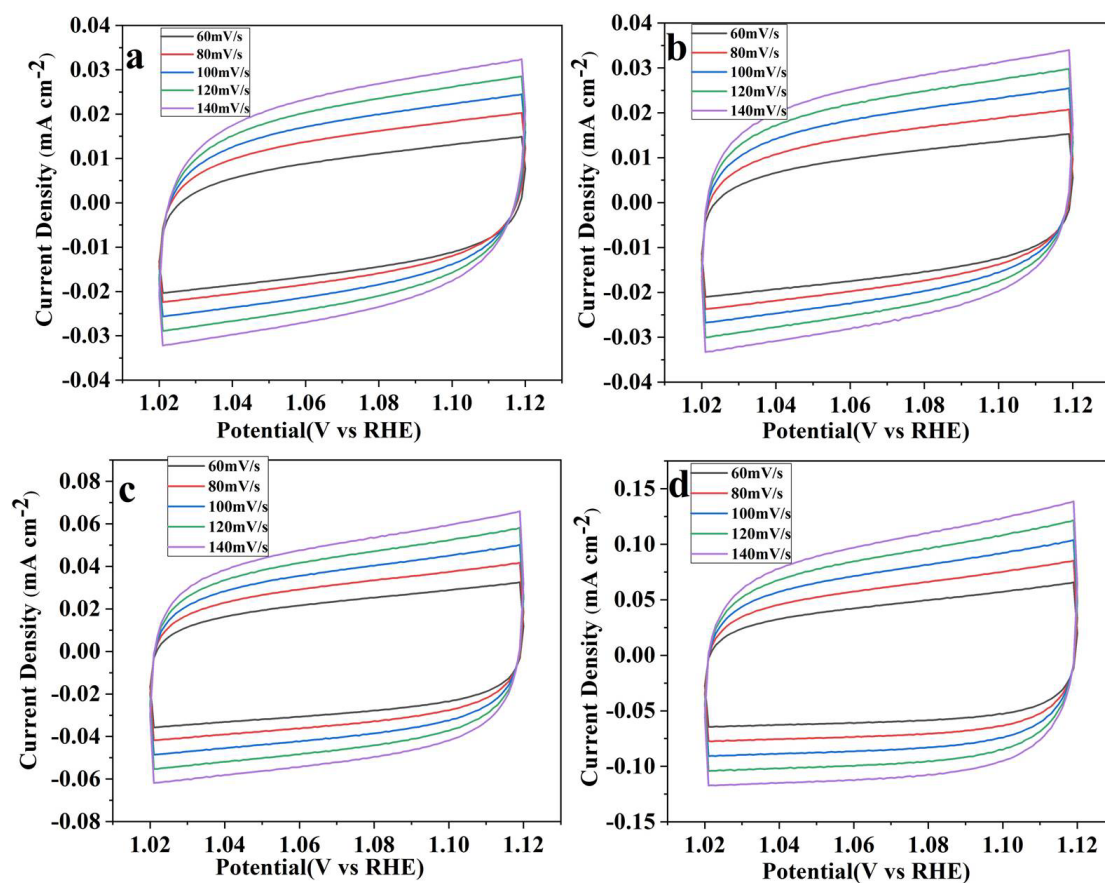

Fig. S9 CV curves with different scan rates for OER, Ni(OH)<sub>2</sub>/NF (a), NiFe LDH/NF (b), Ce-NiFe LDH/NF (c) and Ce(OH)<sub>3</sub>@NiFe LDH/NF (d).

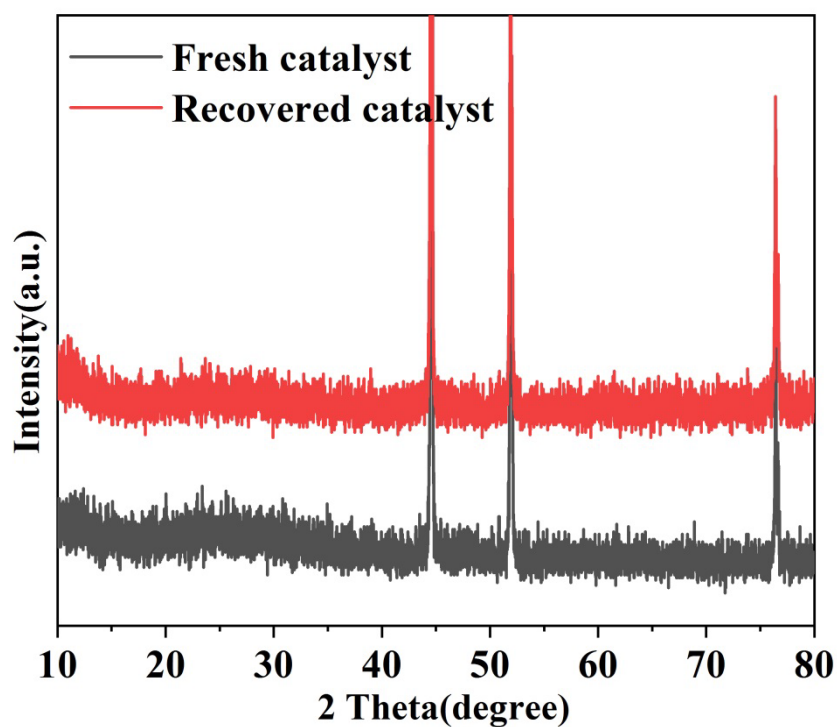

Fig. S10 XRD of fresh (a) and recovered (b) Ce(OH)<sub>3</sub>@NiFe LDH/NF for UOR.



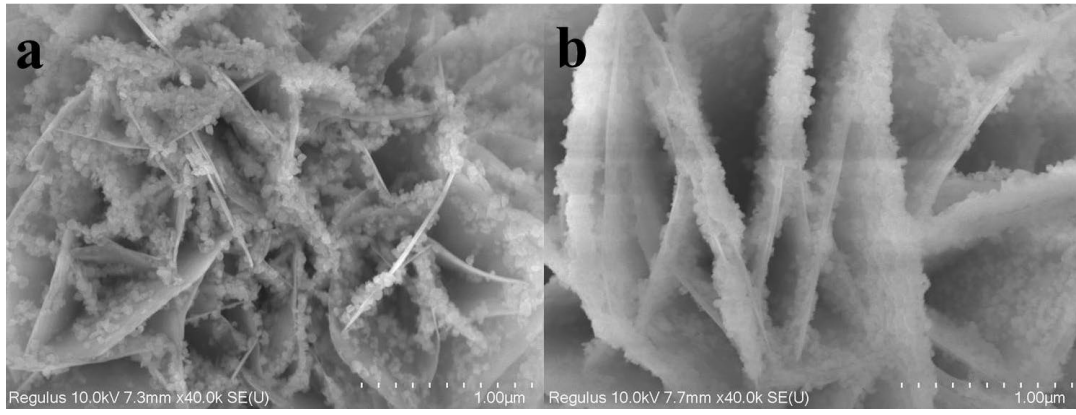

**Fig. S11** SEM of fresh (a) and recovered (b)  $\text{Ce}(\text{OH})_3@ \text{NiFe}$  LDH/NF for UOR.
